# Supplementary material for: Exogenous Melatonin Application Enhances Rhizophagus irregularis Symbiosis and Induces the Antioxidant Response of Medicago truncatula Under Lead Stress
Source: Front Microbiol. 2020 Apr 15;11:516. doi: 10.3389/fmicb.2020.00516 (PMC7174712; doi:10.3389/fmicb.2020.00516)
Supplement: Supplementary file 2 [file Table_1.xlsx]

## Sheet: Sheet1
Supplementary Table S1 The primers list of real-time PCR
Genes	Forward Primer (5’-3’)	Reverse Primer (5’-3’)	Melting temperature (°C)
MtEFα	TGCTCGATTGCCACACCTCT	TCTCCACAGCCTTGATGACACC	58
MtTDC	CTCACATAAGAAGCCACATT	CGCAACAACCTTGAATCTA	50
MtT5H	GCTCCTTACAGTGCTTAC	CAACTTCTTCTTCTCTAACAAC	45
MtSANT	CAACTATTACTTCCTGCTA	TTCTTCGTCTTCTTCTTC	44
MtASMT	TGATTGAAGAAGGAGAAG	TGAACAGCATTGATAGAT	44
MtPT4	CATCTTTGCCGGATTGGTTTCAA	GGCTGTGTTGAAAAATTGGGTCTT	55
MtP5CS	GACCTGATGCTCTTGTTC	GCTGAAGTAATAATCTTGTGTAA	55
